# Supplementary material
Source: PubMed Central journal article supplement (PMC3278288)
Supplement: supp_mcr170_mcr170supp.pdf [file supp_mcr170_mcr170supp.pdf]

## SUPPLEMENTARY DATA

References for literature used to review the relative seed fertility of females and hermaphrodites, and population sex ratios.

- Aguirre A, Vallejo-Marin M, Salazar-Gorozieta L, Arias DM, Dirzo R. 2007.** Variation in sexual expression in *Jacaratia mexicana* (Caricaceae) in southern Mexico: frequency and relative seed performance of fruit-producing males. *Biotropica* **39**: 79–86.
- Alonso C. 2005.** Pollination success across an elevation and sex ratio gradient in gynodioecious *Daphne laureola*. *American Journal of Botany* **92**: 1264–1269.
- Alonso C, Mutikainen P, Herrera CM. 2007.** Ecological context of breeding system variation: sex, size and pollination in a (predominantly) gynodioecious shrub. *Annals of Botany* **100**: 1547–1556.
- Arroyo MTK, Raven PH. 1975.** The evolution of subdioecy in morphologically gynodioecious species of *Fuchsia* sect. *Encliandra* (Onagraceae). *Evolution* **29**: 500–511.
- Ashman TL, King EA. 2005.** Are flower-visiting ants mutualists or antagonists? A study in a gynodioecious wild strawberry. *American Journal of Botany* **92**: 891–895.
- Beaumont AJ, Edwards TJ, Smith FR. 2006.** The first record of gynodioecy in a species of *Gnidia* (Thymelaeaceae) from South Africa. *Botanical Journal of the Linnean Society* **152**: 219–233.
- Binggeli P, Power J. 1991.** Gender variation in ash (*Fraxinus excelsior* L.). <http://members.multimania.co.uk/WoodyPlantEcology/species/ash.htm>
- Caruso CM, Yakobowski SJ. 2008.** Selection on floral and carbon uptake traits of *Lobelia siphilitica* is similar in females and hermaphrodites. *Journal of Evolutionary Biology* **21**: 1514–1523.
- Case AL, Ashman TL. 2007.** An experimental test of the effects of resources and sex ratio on maternal fitness and phenotypic selection in gynodioecious *Fragaria virginiana*. *Evolution* **61**: 1900–1911.
- Chang SM. 2006.** Female compensation through the quantity and quality of progeny in a gynodioecious plant, *Geranium maculatum* (Geraniaceae). *American Journal of Botany* **93**: 263–270.
- Collin CL, Shykoff JA. 2010.** Flowering phenology and female fitness: impact of a pre-dispersal seed predator on a sexually polymorphic species. *Plant Ecology* **206**: 1–13.
- Cuevas E, Parker IM, Molina-Freaner F. 2008.** Variation in sex ratio, morph-specific reproductive ecology and an experimental test of frequency-dependence in the gynodioecious *Kallstroemia grandiflora* (Zygophyllaceae). *Journal of Evolutionary Biology* **21**: 1117–1124.
- del Castillo RF, Argueta ST. 2009.** Reproductive implications of combined and separate sexes in a trioecious population of *Opuntia robusta* (Cactaceae). *American Journal of Botany* **96**: 1148–1158.
- Delph LF, Lloyd DG. 1991.** Environmental and genetic control of gender in the dimorphic shrub *Hebe subalpina*. *Evolution* **45**: 1957–1964.
- Dorken ME, Mitchard ETA. 2008.** Phenotypic plasticity of hermaphrodite sex allocation promotes the evolution of separate sexes: An experimental test of the sex-differential plasticity hypothesis using *Sagittaria latifolia* (Alismataceae). *Evolution* **62**: 971–978.

- Fleming TH, Maurice S, Buchmann SL, Tuttle MD. 1994.** Reproductive biology and relative male and female fitness in a trioecious cactus, *Pachycereus pringlei* (Cactaceae). *American Journal of Botany* **81**: 858–867.
- Garcia EC, Marquez J, Dominguez CA, Molina-Freaner F. 2005.** Evidence of gynodioecy in *Kallstroemia grandiflora* (Zygophyllaceae): microsporogenesis in hermaphrodite and female plants and lack of reproductive compensation. *International Journal of Plant Sciences* **166**: 481–491.
- Huang SQ, Lu Y, Chen YZ, Luo YB, Delph LF. 2009.** Parthenogenesis maintains male sterility in a gynodioecious orchid. *American Naturalist* **174**: 578–584.
- Humeau L, Pailler T, Thompson JD. 1999.** Variation in the breeding system of two sympatric *Dombeya* species on La Réunion island. *Plant Systematics and Evolution* **218**: 77–87.
- Humeau L, Pailler T, Thompson JD. 2000.** Variation in gender and flower-size dimorphism in the dioecious tree *Dombeya ciliata*, an endemic to La Reunion Island. *Biotropica* **32**: 463–472.
- Kay Q. 1985.** Hermaphrodites and subhermaphrodites in a reputedly dioecious plant, *Cirsium arvense* (L.) Scop. *New Phytologist* **100**: 457–472.
- Kubota S, Ohara M. 2009.** Discovery of male sterile plants and their contrasting occurrence between self-compatible and self-incompatible populations of the hermaphroditic perennial *Trillium camschatcense*. *Plant Species Biology* **24**: 169–178.
- Ladley JJ, Kelly D, Robertson AW. 1997.** Explosive flowering, nectar production, breeding systems, and pollinators of New Zealand mistletoes (Loranthaceae). *New Zealand Journal of Botany* **35**: 345–360.
- Lafuma L, Maurice S. 2006.** Reproductive characters in a gynodioecious species, *Silene italica* (Caryophyllaceae), with attention to the gynomonoeious phenotype. *Biological Journal of the Linnean Society* **87**: 583–591.
- Leigh A, Cosgrove MJ, Nicotra AB. 2006.** Reproductive allocation in a gender dimorphic shrub: anomalous female investment in *Gynatrix pulchella*? *Journal of Ecology* **94**: 1261–1271.
- Leite AVD, Machado IC. 2010.** Reproductive biology of woody species in Caatinga, a dry forest of northeastern Brazil. *Journal of Arid Environments* **74**: 1374–1380.
- Litrico I, Pailler T, Thompson J. 2005.** Gender variation and primary succession in a tropical woody plant, *Antirhea borbonica* (Rubiaceae). *Journal of Ecology* **93**: 705–715.
- Lopes A, Machado I. 1998.** Floral biology and reproductive ecology of *Clusia nemorosa* (Clusiaceae) in northeastern Brazil. *Plant Systematics and Evolution* **213**: 71–90.
- Lopez-Villavicencio M, Branca A, Giraud T, Shykoff JA. 2005a.** Sex-specific effect of *Microbotryum violaceum* (Uredinales) spores on healthy plants of the gynodioecious *Gypsophila repens* (Caryophyllaceae). *American Journal of Botany* **92**: 896–900.
- Lopez-Villavicencio M, Genton BJ, Porcher E, Shykoff JA. 2005b.** The role of pollination level on the reproduction of females and hermaphrodites in the gynodioecious plant *Gypsophila repens* (Caryophyllaceae). *American Journal of Botany* **92**: 1995–2002.
- Marr DL. 2006.** Seed fitness of hermaphrodites in areas with females and anther smut disease: *Silene acaulis* and *Microbotryum violaceum*. *New Phytologist* **169**: 741–751.
- Maurice S, Desfeux C, Mignot A, Henry J. 1998.** Is *Silene acaulis* (Caryophyllaceae) a trioecious species? Reproductive biology of two subspecies. *Botany* **76**: 478–485.
- McCall AC. 2007.** Leaf damage and gender but not flower damage affect female fitness in *Nemophila menziesii* (Hydrophyllaceae). *American Journal of Botany* **94**: 445–450.

- Merrett MF. 2007.** Sex ratios, fruit set and size-class structure in the threatened, gynodioecious, sand-dune species *Pimelea arenaria* (Thymelaeaceae) from New Zealand. *Australian Journal of Botany* **55**: 554–560.
- Merrett MF, Robertson AW, Peterson PG. 2007.** Pollination performance and vulnerability to pollination breakdown of sixteen native shrub species from New Zealand. *New Zealand Journal of Botany* **45**: 579–591.
- Miyake K, Miyake T, Terachi T, Yahara T. 2009.** Relative fitness of females and hermaphrodites in a natural gynodioecious population of wild radish, *Raphanus sativus* L. (Brassicaceae): comparison based on molecular genotyping. *Journal of Evolutionary Biology* **22**: 2012–2019.
- Nilsson E, Agren J. 2006.** Population size, female fecundity, and sex ratio variation in gynodioecious *Plantago maritima*. *Journal of Evolutionary Biology* **19**: 825–833.
- Olson MS. 2001.** Patterns of fruit production in the subdioecious plant *Astilbe biternata* (Saxifragaceae). *Ecology* **89**: 600–607.
- Olson MS, Graf AV, Niles KR. 2006.** Fine scale spatial structuring of sex and mitochondria in *Silene vulgaris*. *Journal of Evolutionary Biology* **19**: 1190–1201.
- Olson MS, McCauley DE, Taylor D. 2005.** Genetics and adaptation in structured populations: sex ratio evolution in *Silene vulgaris*. *Genetica* **123**: 49–62.
- Orellana MR, Rovira AM, Blanche C, Bosch M. 2005.** Pollination and reproductive success in the gynodioecious endemic *Thymus loscosii* (Lamiaceae). *Canadian Journal of Botany- Revue Canadienne De Botanique* **83**: 183–193.
- Pansarin ER. 2008.** Reproductive biology of *Echinodorus longipetalus* (Alismataceae): sexual morphs, breeding system and pollinators. *Aquatic Botany* **89**: 404–408.
- Philipp M, Jakobsen RB, Nachman G. 2009.** A comparison of pollen-siring ability and life history between males and hermaphrodites of subdioecious *Silene acaulis*. *Evolutionary Ecology Research* **11**: 787–801.
- Ramsey M, Vaughton G, Peakall R. 2006a.** Does inbreeding avoidance maintain gender dimorphism in *Wurmbea dioica* (Colchicaceae)? *Journal of Evolutionary Biology* **19**: 1497–1506.
- Ramsey M, Vaughton G, Peakall R. 2006b.** Inbreeding avoidance and the evolution of gender dimorphism in *Wurmbea biglandulosa* (Colchicaceae). *Evolution* **60**: 529–537.
- Robertson AW, Ladley JJ, Kelly D, McNutt KL, Peterson PG, Merrett MF, Karl BJ. 2008.** Assessing pollination and fruit dispersal in *Fuchsia excorticata* (Onagraceae). *New Zealand Journal of Botany* **46**: 299–314.
- Sakai AK, Weller SG. 1991.** Ecological aspects of sex expression in subdioecious *Schiedea globosa* (Caryophyllaceae). *American Journal of Botany* **78**: 1280–1288.
- Sakai AK, Weller SG, Wagner WL, Nepokroeff M, Culley TM. 2006.** Adaptive radiation and evolution of breeding systems in *Schiedea* (Caryophyllaceae), an endemic Hawaiian genus. *Annals of the Missouri Botanical Garden* **93**: 49–63.
- Sakai AK, Weller SG, Culley TM, Campbell DR, Dunbar-Wallis AK, Andres A. 2008.** Sexual dimorphism and the genetic potential for evolution of sex allocation in the gynodioecious plant, *Schiedea salicaria*. *Journal of Evolutionary Biology* **21**: 18–29.
- Silva CA, Oliva MA, Vieira MF, Fernandes GW. 2008.** Trioecy in *Coccoloba cereifera* Schwacke (Polygonaceae), a narrow endemic and threatened tropical species. *Brazilian Archives of Biology and Technology* **51**: 1003–1010.

- Van Etten ML, Prevost LB, Deen AC, Ortiz BV, Donovan LA, Chang SM. 2008.** Gender differences in reproductive and physiological traits in a gynodioecious species, *Geranium maculatum* (geraniaceae). *International Journal of Plant Sciences* **169**: 271–279.
- Varga S, Kytoviita MM. 2010.** Gender dimorphism and mycorrhizal symbiosis affect floral visitors and reproductive output in *Geranium sylvaticum*. *Functional Ecology* **24**: 750–758.
- Varga S, Kytoviita MM, Siikamaki P. 2009.** Sexual differences in response to simulated herbivory in the gynodioecious herb *Geranium sylvaticum*. *Plant Ecology* **202**: 325–336.
- Vaughton G, Ramsey M. 2004.** Dry environments promote the establishment of females in monomorphic populations of *Wurmbea biglandulosa* (Colchicaceae). *Evolutionary Ecology* **18**: 323–341.
- Weller SG, Sakai AK. 2005.** Selfing and resource allocation in *Schiedea salicaria* (Caryophyllaceae), a gynodioecious species. *Journal of Evolutionary Biology* **18**: 301–308.
- Weller SG, Sakai AK, Culley TM, Campbell DR, Dunbar-Wallis AK. 2006.** Predicting the pathway to wind pollination: heritabilities and genetic correlations of inflorescence traits associated with wind pollination in *Schiedea salicaria* (Caryophyllaceae). *Journal of Evolutionary Biology* **19**: 331–342.
- Weller SG, Sakai AK, Culley TM, Campbell DR, Ngo P, Dunbar-Wallis AK. 2007.** Sexually dimorphic inflorescence traits in a wind-pollinated species: heritabilities and genetic correlations in *Schiedea adamantis* (Caryophyllaceae). *American Journal of Botany* **94**: 1716–1725.
- Wolfe L, Shmida A. 1997.** The ecology of sex expression in a gynodioecious Israeli desert shrub (*Ochradenus baccatus*). *Ecology* **78**: 101–110.
- Zhang YW, Wang Y, Yu Q, Zhao JM. 2008.** Sex expression, female frequency, and reproductive output in a gynodioecious clonal herb, *Glechoma longituba* (Lamiaceae). *Plant Ecology* **199**: 255–264.
- Zhang YW, Yang CF, Zhao JM, Guo YH. 2009.** Selective nectar robbing in a gynodioecious plant (*Glechoma longituba*) enhances female advantage. *Journal of Evolutionary Biology* **22**: 527–535.
